# Supplementary material for: Bimetallic Organic Gel for Effective Methyl Orange Dye Adsorption
Source: MDPI journal article supplement (doi:10.3390/gels10030208), 2024-03-19
Supplement: s1 [file s1]

## Supplementary Information: Bimetallic Organic Gel for Effective Methyl orange

### Dye Adsorption

Hua Jin\*, Xin-Yuan Xu, Xiao-Yang Yu, Shi-Hua Yu, Shan-Shan Wang, Xiao-Shu Qu

Jilin Institute of Chemical Technology, 45 Chengde Street, Jilin, 132073, China

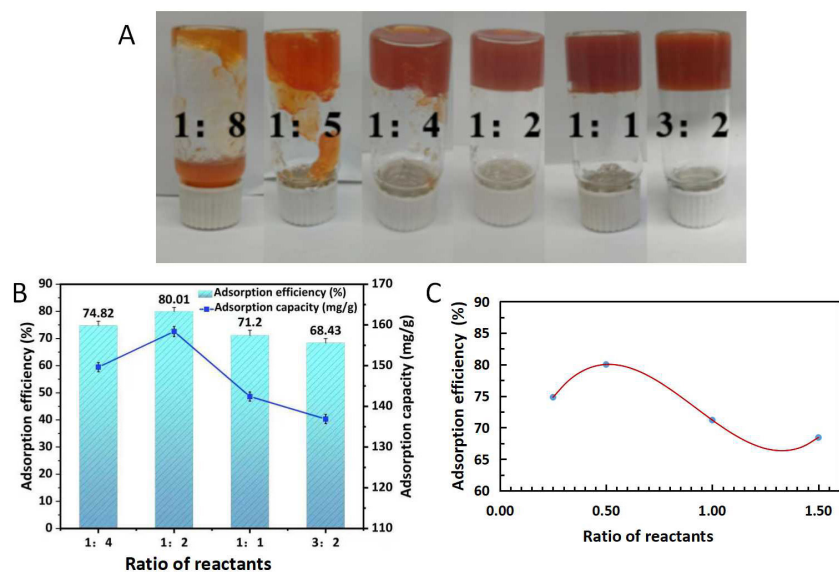

**Figure S1.** Products synthesized under different reactants ratio (under the same synthesis conditions) (A); Adsorption efficiency of the products (reactant ratios of 1:4, 1:2, 1:1, and 3:2, respectively) (B); Fitting results of the relationship between the reactant ratio and the adsorption efficiency (C) ( $C_0$  (MO): 100 mg/L; adsorbent: 0.5 g/L; pH: deregulation).

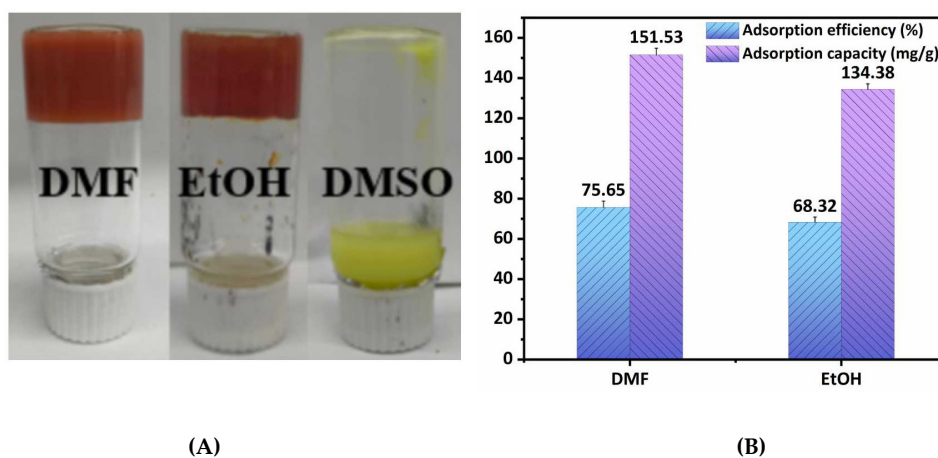

**Figure S2.** Products synthesized in different solvents (under the same synthesis conditions) (A); Adsorption performance of products from DMF and EtOH (B) ( $C_0$ : 100 mg/L; adsorbent: 0.5 g/L; pH: deregulation).

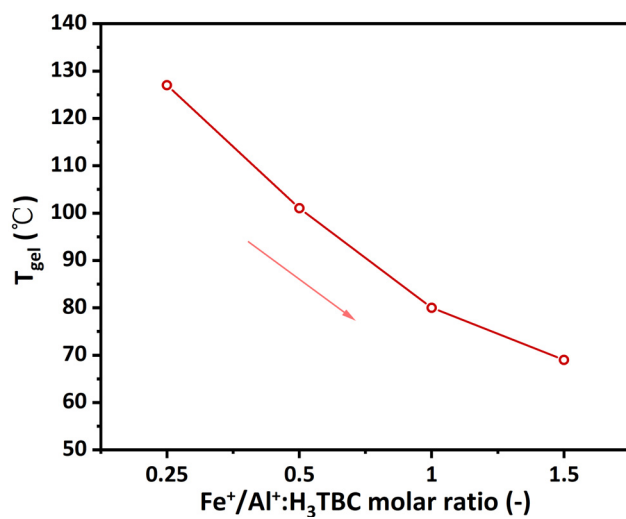

**Figure S3.** The result of T<sub>gel</sub> screening ( MOG-Fe/Al, reactant ratios:1:4, 1:2, 1:1, and 3:2).

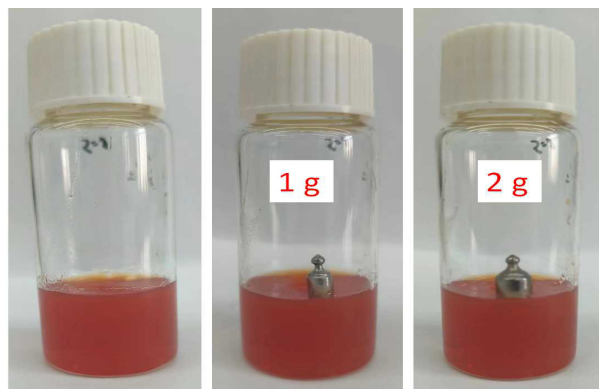

**Figure S4.** The result of falling ball experiment of MOG-Fe/Al (Observation time: 24 h, 1 g and 2 g weights were used).

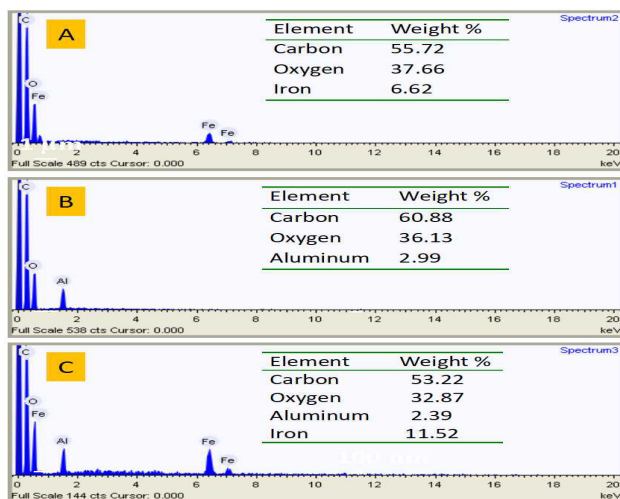

**Figure S5.** EDS spectra of MOG-Fe (A), MOG-Al (B), MOG-Fe/Al (C).

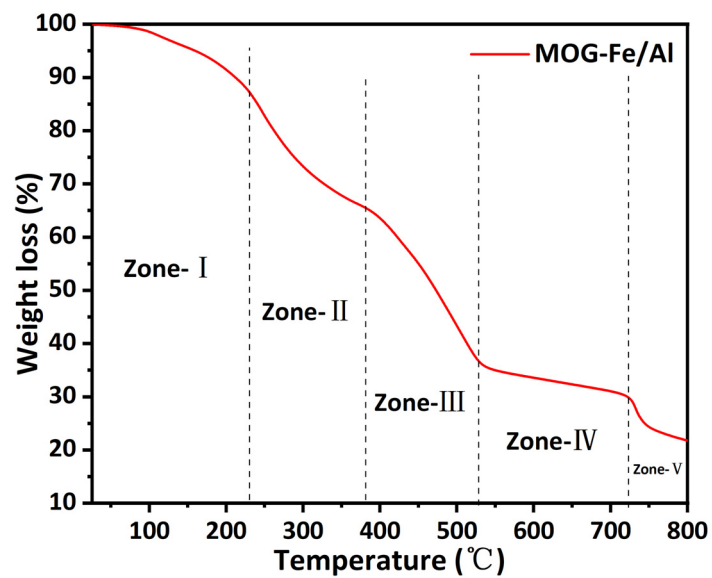

Figure S6. The TGA curve of MOG-Fe/Al.

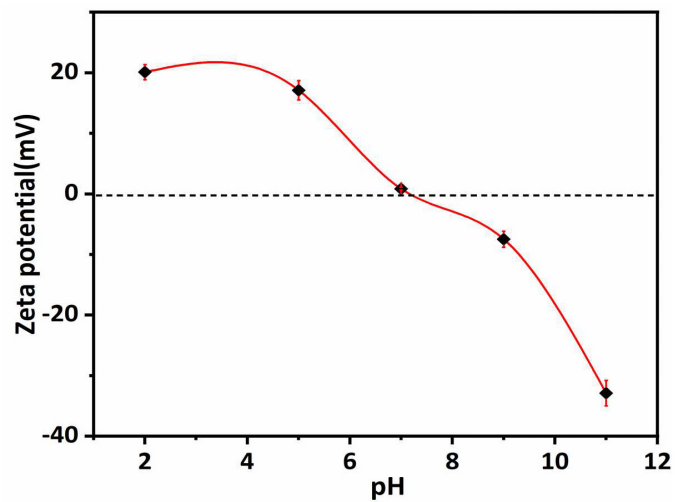

Figure S7. Zeta potential at different pH (adsorbent: 0.5 g/L; pH: deregulation; T: 298 K).

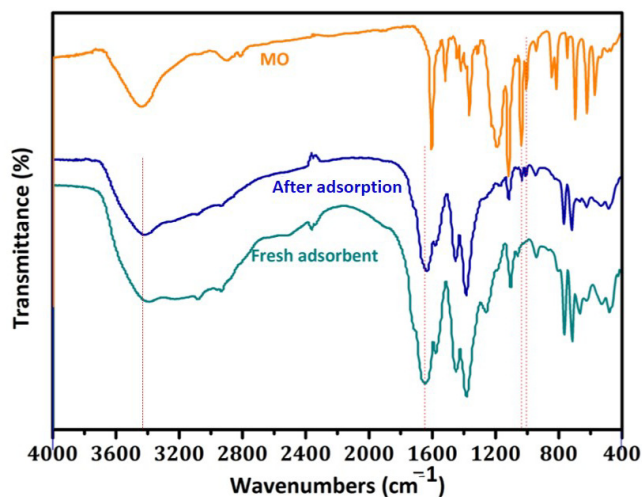

**Figure S8.** The FT-IR spectra of MOG-Fe/Al before and after MO adsorption.

**Table S1** – Homogenous processes by leached iron and aluminum from the MOG-Fe/Al.

| Metal element                                                                                                                                                                                                                                                                                                                                                                                                                                    | Fe     | Al     |
|--------------------------------------------------------------------------------------------------------------------------------------------------------------------------------------------------------------------------------------------------------------------------------------------------------------------------------------------------------------------------------------------------------------------------------------------------|--------|--------|
| Mass of fraction of element <sup>a</sup> (%)                                                                                                                                                                                                                                                                                                                                                                                                     | 11.52  | 2.39   |
| Concentration of leached element <sup>b</sup> (mg/L)                                                                                                                                                                                                                                                                                                                                                                                             | 0.0512 | 0.0449 |
| Leached element percentage of total element <sup>c</sup> (%)                                                                                                                                                                                                                                                                                                                                                                                     | 0.09   | 0.37   |
| <p><b>a:</b> Mass fraction of element: tested by EDS.</p> <p><b>b:</b> Concentration of leached element: tested by ICP-OES.</p> <p><b>c:</b> Leached element percentage of total element: calculated with 20 mg adsorbents and by the equation <math>\text{percentage} = \frac{m_L}{m_T} \times 100 \%</math></p> <p><math>m_L</math> = leached element content (mg), <math>m_T</math> = total element content in the fresh adsorbents (mg).</p> |        |        |

**Table S2** – Comparison of MO adsorption capacities of with MOG-Fe/Al other reported adsorbents.

| Adsorbent | Dosage<br>(g/L) | Pollutant<br>concentration<br>(mg/L) | Adsorption<br>capacity<br>(mg/g) | References |
|-----------|-----------------|--------------------------------------|----------------------------------|------------|
|-----------|-----------------|--------------------------------------|----------------------------------|------------|

|                                           |     |          |        |                                                               |
|-------------------------------------------|-----|----------|--------|---------------------------------------------------------------|
| Zn -MOG                                   | 2   | 50       | 100    | Colloid surface A. <b>2021</b> , 628, 127335 [40]             |
| Bimetallic MOG                            | 1   | 50-200   | 265    | Sci. Rep. <b>2015</b> , 5, 10556. [24]                        |
| Magnetic porous carbon (MPC)              | 0.5 | 12.5-400 | 182.82 | Dalton Transactions, <b>2016</b> , 45, 4541-4547 [41].        |
| Three-dimensional graphene aerogel (TCGA) | 1   | 100      | 56.4   | New Journal of Chemistry, <b>2020</b> , 44, 16285-16293. [42] |
| MOG-Fe/Al                                 | 0.5 | 10-500   | 335.88 | This work                                                     |
